# Supplementary material for: Positive vaccine beliefs linked to reduced mental stress in healthcare professionals during COVID-19: a retrospective study
Source: PubMed Central journal article supplement (PMC11445048; doi:10.3389/fpsyt.2024.1402194), 2024-09-18
Supplement: DataSheet1.pdf [file DataSheet1.pdf]

## Supplemental Materials

### Positive Vaccine Beliefs Linked to Reduced Mental Stress in Healthcare Professionals During COVID-19: A Retrospective Study

Supplemental Figure 1. The burnout questionnaire for this study.

#### Personal Burnout Questions

1. How often do you feel tired?

(4) Always (3) Often (2) Sometimes (1) Seldom (0) Never/rarely.

2. How often are you physically exhausted?

(4) Always (3) Often (2) Sometimes (1) Seldom (0) Never/rarely.

3. How often are you emotionally exhausted?

(4) Always (3) Often (2) Sometimes (1) Seldom (0) Never/rarely.

4. How often do you think: "I can't take it anymore"?

(4) Always (3) Often (2) Sometimes (1) Seldom (0) Never/rarely.

5. How often do you feel worn out?

(4) Always (3) Often (2) Sometimes (1) Seldom (0) Never/rarely.

6. How often do you feel weak and susceptible to illness?

(4) Always (3) Often (2) Sometimes (1) Seldom (0) Never/rarely.

(4) Always: 100. (3) Often: 75. (2) Sometimes: 50. (1) Seldom: 25. (0) Never/rarely: 0.

The score of personal burnout is the average score of the above 6 questions (1-6).

#### Work-related Burnout Questions

7. Is your work emotionally exhausting?

(4) To a very high degree (3) To a high degree (2) Somewhat (1) To a low degree (0) To a very low degree.

8. Do you feel burnt out because of your work?

(4) To a very high degree (3) To a high degree (2) Somewhat (1) To a low degree (0) To a very low degree.

9. Does your work frustrate you?

(4) To a very high degree (3) To a high degree (2) Somewhat (1) To a low degree (0) To a very low degree.

10. Do you feel worn out at the end of the working day?

(4) Always (3) Often (2) Sometimes (1) Seldom (0) Never/rarely.

11. Are you exhausted in the morning at the thought of another day at work?

(4) Always (3) Often (2) Sometimes (1) Seldom (0) Never/rarely.

12. Do you feel that every working hour is tiring for you?

(4) Always (3) Often (2) Sometimes (1) Seldom (0) Never/rarely.

13#. Do you have enough energy for family and friends during your leisure time?

(4) Always (3) Often (2) Sometimes (1) Seldom (0) Never/rarely.

(4) Always: 100. (3) Often: 75. (2) Sometimes: 50. (1) Seldom: 25. (0) Never/rarely: 0.

The score of work-related burnout is the average score of the above 7 questions (7-13).

# Reversed score for the last question.

#### Reference:

1. Yeh W.Y., Cheng Y., Chen C.J., Hu P.Y., Kristensen T.S. Psychometric properties of the Chinese version of Copenhagen burnout inventory among employees in two companies in Taiwan. *Int. J. Behav. Med.* 2007;14:126-133.

Supplemental Table 1. Investigation of the factors related to moderate/severe mood disorder in 2021 (Detail).

| Variables              | Crude OR 95%CI     | P-value | Adjusted OR 95%CI  | P-value |
|------------------------|--------------------|---------|--------------------|---------|
| <b>Gender</b>          |                    |         |                    |         |
| Male                   | 1 (Ref.)           |         |                    |         |
| Female                 | 1.05 (0.66-1.68)   | 0.835   |                    |         |
| <b>Age (years)</b>     |                    |         |                    |         |
| 21-30                  | 1 (Ref.)           |         | 1 (Ref.)           |         |
| 31-40                  | 1.07 (0.65 – 1.76) | 0.784   | 1.18 (0.71 – 1.95) | 0.530   |
| 41-50                  | 1.06 (0.66 – 1.72) | 0.805   | 1.13 (0.70 – 1.85) | 0.613   |
| > 50                   | 0.60 (0.34 -1.07)  | 0.083   | 0.78 (0.43 – 1.39) | 0.398   |
| <b>Title</b>           |                    |         |                    |         |
| Physician              | 1 (Ref.)           |         |                    |         |
| Nurse                  | 0.84 (0.32 - 2.21) | 0.720   |                    |         |
| Medical staff          | 0.49 (0.17 – 1.46) | 0.202   |                    |         |
| Technician             | 0.48 (0.11 – 2.18) | 0.342   |                    |         |
| Administration         | 0.89 (0.32 – 2.44) | 0.817   |                    |         |
| <b>Patient contact</b> |                    |         |                    |         |
| No                     | 1 (Ref.)           |         |                    |         |
| Yes                    | 1.05 (0.72 -1.53)  | 0.805   |                    |         |
| <b>Working area</b>    |                    |         |                    |         |
| ER                     | 1 (Ref.)           |         |                    |         |
| ICU/isolation wards    | 1.18 (0.59 – 2.34) | 0.636   |                    |         |
| General wards          | 0.75 (0.40 -1.41)  | 0.368   |                    |         |
| OPD/exam rooms         | 0.71 (0.35 – 1.43) | 0.336   |                    |         |
| RnC/PS/P               | 1.05 (0.46 – 2.43) | 0.906   |                    |         |
| Administrative area    | 0.70 (0.34 – 1.46) | 0.343   |                    |         |
| Others                 | 0.72 (0.38 – 1.45) | 0.363   |                    |         |
| <b>Vaccine belief</b>  |                    |         |                    |         |
| No                     | 1 (Ref.)           |         | 1 (Ref.)           |         |
| Yes                    | 0.36 (0.26 – 0.50) | < 0.001 | 0.38 (0.28 – 0.52) | < 0.001 |

The parameters with  $p < 0.1$  in univariate were included in the multivariate analysis. ER, emergency room; ICU, intensive care unit; OPD, outpatient department; RnC/PS/P, registration and cashier/patient service/pharmacy.

Supplemental Table 2. Investigation of the factors related to moderate/severe mood disorder in 2022 (Detail).

| Variables           | Crude OR 95%CI     | <i>P</i> -value | Adjusted OR 95%CI  | <i>P</i> -value |
|---------------------|--------------------|-----------------|--------------------|-----------------|
| Gender              |                    |                 |                    |                 |
| Male                | 1 (Ref.)           |                 |                    |                 |
| Female              | 0.95 (0.62-1.47)   | 0.826           |                    |                 |
| Age (years)         |                    |                 |                    |                 |
| 21-30               | 1 (Ref.)           |                 | 1 (Ref.)           |                 |
| 31-40               | 1.16 (0.68 – 1.98) | 0.590           | 1.23 (0.75 – 2.23) | 0.347           |
| 41-50               | 1.20 (0.72 – 2.02) | 0.486           | 1.30 (0.77 – 2.20) | 0.320           |
| > 50                | 0.53 (0.29 -0.97)  | 0.040           | 0.68 (0.37 – 1.27) | 0.224           |
| Category Group      |                    |                 |                    |                 |
| Physician           | 1 (Ref.)           |                 |                    |                 |
| Nurse               | 1.34 (0.60 - 2.98) | 0.475           |                    |                 |
| Medical staff       | 0.81 (0.32 – 1.97) | 0.639           |                    |                 |
| Technician          | 1.09 (0.30 – 3.99) | 0.892           |                    |                 |
| Administration      | 1.14 (0.49 – 2.64) | 0.753           |                    |                 |
| Patient contact     |                    |                 |                    |                 |
| No                  | 1 (Ref.)           |                 |                    |                 |
| Yes                 | 1.12 (0.79 -1.60)  | 0.522           |                    |                 |
| Working area        |                    |                 |                    |                 |
| ER                  | 1 (Ref.)           |                 |                    |                 |
| ICU/isolation wards | 1.46 (0.70 – 3.05) | 0.310           |                    |                 |
| General wards       | 0.98 (0.49 -1.95)  | 0.958           |                    |                 |
| OPD/exam rooms      | 1.05 (0.52 – 2.16) | 0.887           |                    |                 |
| RnC/PS/P            | 1.47 (0.62 – 3.53) | 0.383           |                    |                 |
| Administrative area | 0.93 (0.43 – 2.02) | 0.851           |                    |                 |
| Others              | 1.16 (0.57 – 2.36) | 0.683           |                    |                 |
| Vaccine belief      |                    |                 |                    |                 |
| No                  | 1 (Ref.)           |                 | 1 (Ref.)           |                 |
| Yes                 | 0.35 (0.26 – 0.48) | < 0.001         | 0.41 (0.30 – 0.52) | < 0.001         |

The parameters with  $p < 0.1$  in univariate were included in the multivariate analysis. ER, emergency room; ICU, intensive care unit; OPD, outpatient department; RnC/PS/P, registration and cashier/patient service/pharmacy.

Supplemental Table 3. Investigation of the factors related to positive vaccine belief in 2021 (Detail).

| Variables                   | Crude OR 95%CI     | P-value | Adjusted OR 95%CI  | P-value |
|-----------------------------|--------------------|---------|--------------------|---------|
| <b>Gender group</b>         |                    |         |                    |         |
| Male                        | 1 (Ref.)           |         | 1 (Ref.)           |         |
| Female                      | 0.64 (0.46 – 0.90) | 0.010   | 0.74 (0.52 – 1.06) | 0.100   |
| <b>Age subgroup (years)</b> |                    |         |                    |         |
| 21-30                       | 1 (Ref.)           |         | 1 (Ref.)           |         |
| 31-40                       | 1.45 (1.03 – 2.03) | 0.031   | 1.38 (0.98 - 1.95) | 0.062   |
| 41-50                       | 1.30 (0.94 - 1.80) | 0.111   | 1.23 (0.88 – 1.72) | 0.219   |
| > 50                        | 3.08 (2.12 – 4.47) | <0.001  | 2.67 (1.81 – 3.93) | <0.001  |
| <b>Category Group</b>       |                    |         |                    |         |
| Physician                   | 1 (Ref.)           |         |                    |         |
| Nurse                       | 0.60 (0.28 – 1.24) | 0.167   |                    |         |
| Medical staff               | 1.26 (0.57 – 2.77) | 0.566   |                    |         |
| Technician                  | 1.08 (0.40 – 2.93) | 0.875   |                    |         |
| Administration              | 1.07 (0.49 – 2.29) | 0.870   |                    |         |
| <b>Patient contact</b>      |                    |         |                    |         |
| No                          | 1 (Ref.)           |         | 1 (Ref.)           |         |
| Yes                         | 0.62 (0.48 – 0.80) | <0.001  | 1.06 (0.74 – 1.51) | 0.751   |
| <b>Working space/area</b>   |                    |         |                    |         |
| ER                          | 1 (Ref.)           |         |                    |         |
| ICU/isolation wards         | 0.73 (0.45 – 1.21) | 0.224   | 0.80 (0.48 – 1.34) | 0.400   |
| General wards               | 0.98 (0.63 – 1.53) | 0.980   | 1.05 (0.67 – 1.66) | 0.822   |
| OPD/exam rooms              | 1.48 (0.91 – 2.40) | 0.113   | 1.43 (0.87 - 2.34) | 0.156   |
| RnC/PS/P                    | 1.34 (0.73 – 2.47) | 0.350   | 1.21 (0.65 – 2.25) | 0.557   |
| Administrative area         | 2.14 (1.27 – 3.59) | 0.004   | 2.03 (1.12 – 3.71) | 0.020   |
| Others                      | 1.62 (0.99 – 2.63) | 0.054   | 1.06 (0.93 – 2.57) | 0.092   |

The parameters with  $p < 0.1$  in univariate were included in the multivariate analysis. ER, emergency room; ICU, intensive care unit; OPD, outpatient department; RnC/PS/P, registration and cashier/patient service/pharmacy.

Supplemental Table 4. Investigation of the factors related to positive vaccine belief in 2022 (Detail).

| Variables                   | Crude OR 95%CI     | P-value | Adjusted OR 95%CI  | P-value |
|-----------------------------|--------------------|---------|--------------------|---------|
| <b>Gender group</b>         |                    |         |                    |         |
| Male                        | 1 (Ref.)           |         | 1 (Ref.)           |         |
| Female                      | 0.66 (0.49 – 0.88) | 0.004   | 0.95 (0.67 – 1.36) | 0.78    |
| <b>Age subgroup (years)</b> |                    |         |                    |         |
| 21-30                       | 1 (Ref.)           |         | 1 (Ref.)           |         |
| 31-40                       | 1.65 (1.17 – 2.22) | 0.004   | 1.49 (1.05-2.13)   | 0.025   |
| 41-50                       | 1.43 (1.03 – 1.99) | 0.034   | 1.24 (0.88 – 1.75) | 0.214   |
| > 50                        | 3.34 (2.38 – 4.95) | <0.001  | 2.77 (1.88 – 4.08) | <0.001  |
| <b>Category Group</b>       |                    |         |                    |         |
| Physician                   | 1 (Ref.)           |         | 1 (Ref.)           |         |
| Nurse                       | 0.38 (0.23 – 0.66) | 0.001   | 0.49 (0.27 – 0.90) | 0.022   |
| Medical staff               | 0.85 (0.47 – 1.53) | 0.580   | 0.90 (0.47 – 1.71) | 0.746   |
| Technician                  | 0.88 (0.37 – 2.10) | 0.772   | 0.72 (0.29 – 1.78) | 0.474   |
| Administration              | 0.65 (0.37 – 1.14) | 0.136   | 0.55 (0.29 – 1.04) | 0.065   |
| <b>Patient contact</b>      |                    |         |                    |         |
| No                          | 1 (Ref.)           |         | 1 (Ref.)           |         |
| Yes                         | 0.58 (0.46 – 0.74) | <0.001  | 0.85 (0.61 – 1.18) | 0.331   |
| <b>Working space/area</b>   |                    |         |                    |         |
| ER                          | 1 (Ref.)           |         | 1 (Ref.)           |         |
| ICU/isolation wards         | 0.84 (0.52 – 1.33) | 0.452   | 0.94 (0.58 – 1.53) | 0.804   |
| General wards               | 1.07 (0.70 – 1.62) | 0.762   | 1.11 (0.72 – 1.72) | 0.630   |
| OPD/exam rooms              | 1.76 (1.13 – 2.75) | 0.012   | 1.50 (0.94 – 2.39) | 0.087   |
| RnC/PS/P                    | 1.47 (0.82 – 2.64) | 0.196   | 0.97 (0.51 – 1.85) | 0.928   |
| Administrative area         | 2.02 (1.25 – 3.27) | 0.004   | 1.52 (0.85 – 2.73) | 0.160   |
| Others                      | 1.51 (0.97 – 2.35) | 0.067   | 1.20 (0.75 – 1.93) | 0.452   |

The parameters with  $p < 0.1$  in univariate were included in the multivariate analysis. ER, emergency room; ICU, intensive care unit; OPD, outpatient department; RnC/PS/P, registration and cashier/patient service/pharmacy.
